# Supplementary material for: Perspective on ice age Terminations from absolute chronologies provided by global speleothem records
Source: Copernicus journal article supplement (doi:10.5194/cp-2024-37), 2024-05-23
Supplement: Supplementary file 1 [file cp-2024-37-supplement.pdf]

## Supplementary Information

**Supplementary table 1: Further information of speleothem entities that were not analysed as a part of the main manuscript since they only partially cover Terminations or have lower resolution or U-Th dates with larger errors than the records used in the main manuscript. Cave site locations are plotted in Supp. Fig. 1 and time series plots are in Supp. Fig. 2. Some data from the main manuscript are included in the table and plots to enable comparison.**

| region       | site name      | latitude | longitude | elevation (m) | entity name              | age model                   | data source | citation                  | primary interpretation   | secondary interpretation                                       | comments                                                                                  |
|--------------|----------------|----------|-----------|---------------|--------------------------|-----------------------------|-------------|---------------------------|--------------------------|----------------------------------------------------------------|-------------------------------------------------------------------------------------------|
| South Europe | Corchia        | 43.9833  | 10.2167   | 840           | CC-5_2018                | SISAL-Bchron                | SISALv3     | Tzedakis et al., 2018     | rainfall amount          | source water composition                                       |                                                                                           |
|              | Corchia        | 43.9833  | 10.2167   | 840           | CC-1_2018                | SISAL-copRa                 | SISALv3     | Tzedakis et al., 2017     | rainfall amount          | source water composition                                       |                                                                                           |
|              | Soreq          | 31.7558  | 35.0226   | 400           | Soreq_comp osite (green) | author-linear between dates | SISALv3     | Bar-Matthews et al., 2003 | rainfall amount          | source water composition                                       | composite includes stalactites;                                                           |
|              | Jerusalem West | 31.7833  | 35.15     | 700           | AF12 (blue)              | author-polynomial fit       | SISALv3     | Frumkin et al., 1999      | source water composition | change in moisture transport trajectory and linked seasonality | age reversals beyond 100k; calcite precipitation T and ice volume source composition      |
|              | La Vallina     | 43.4100  | -4.8067   | 70            | Garth                    | author-mixed Bchron         | SISALv3     | Stoll et al., 2022        | source water composition | temperature dependency of meteoric precipitation               | confocal band counting                                                                    |
|              | Villars        | 45.43    | 0.78      | 175           | Vil-car1                 | author-linear between dates | SISALv3     | Wainer et al., 2011       | cave air temperature     | disequilibrium                                                 | flowstone; authors flag possible detrital contamination and U-leaching giving older ages, |

|                      |                |         |         |      |           |                |         |                        |                                                  |                                         |                                                                                                          |
|----------------------|----------------|---------|---------|------|-----------|----------------|---------|------------------------|--------------------------------------------------|-----------------------------------------|----------------------------------------------------------------------------------------------------------|
|                      |                |         |         |      |           |                |         |                        | temperature dependency of meteoric precipitation | source water composition                | flowstone; author generated age model uses both cores to create master chronology                        |
| <b>North Europe</b>  | Abaliget       | 46.1333 | 18.1167 | 209  | ABA_1     | author-StalAge | SISALv3 | Koltai et al., 2017    |                                                  |                                         |                                                                                                          |
|                      | Schneckenloch  | 47.4333 | 9.8667  | 1285 | SCH-5     | SISAL-copRa    | SISALv3 | Moseley et al., 2015   | temperature dependency of meteoric precipitation | change in moisture transport trajectory |                                                                                                          |
|                      | Sieben Hengste | 46.75   | 7.81    | 1955 | 7H-12     | author-StalAge | SISALv3 | Luetscher et al., 2021 | temperature dependency of meteoric precipitation | change in moisture transport trajectory |                                                                                                          |
|                      | Neotektonik    | 46.7833 | 8.2666  | 1700 | M37-1-16A | author-OxCal   | SISALv3 | Wilcox et al., 2020    |                                                  |                                         | paper focused on fluid inclusions, no $\delta^{18}\text{O}$ interpretations provided; no reported hiatus |
| <b>North America</b> | Lehman caves   | 39.01   | -114.22 | 2080 | LMC-14    | SISAL-copRa    | SISALv3 | Lachniet et al., 2014  | temperature dependency of meteoric precipitation | change in moisture source latitude      |                                                                                                          |
|                      |                |         |         |      | LMC-21    | SISAL-copRa    | SISALv3 | Lachniet et al., 2014  | temperature dependency of meteoric precipitation | change in moisture source latitude      |                                                                                                          |
|                      |                |         |         |      | LC-2      | SISAL-Bchron   | SISALv3 | Shakun et al., 2011    |                                                  |                                         |                                                                                                          |

|                     |                  |         |          |      |               |                             |         |                           |                                                  |                           |                                                                                        |
|---------------------|------------------|---------|----------|------|---------------|-----------------------------|---------|---------------------------|--------------------------------------------------|---------------------------|----------------------------------------------------------------------------------------|
|                     | Devils Hole      | 36.4254 | 116.2915 | 719  | DH2-D         | author-OxCal                | SISALv3 | Moseley et al., 2016      | temperature dependency of meteoric precipitation | change in seasonality     | sub-aqueous calcite; shallowest core with least 230Th effect and youngest chronologies |
| <b>EAS M</b>        | Dongge           | 25.2833 | 108.0833 | 680  | D4_2005_Kelly | author-unknown              | SISALv3 | Kelly et al., 2006        | change in seasonality                            | upstream rainout          |                                                                                        |
|                     | Sanbao           | 31.667  | 110.4333 | 1900 | SB11          | sisal-copRa                 | SISALv3 | Cheng et al., 2016b       | upstream rainout                                 | change in seasonality     |                                                                                        |
|                     |                  |         |          |      | SB23          | sisal-copRa                 | SISALv3 | Cheng et al., 2016b       | upstream rainout                                 | change in seasonality     |                                                                                        |
|                     |                  |         |          |      | SB25-2        | sisal-copRa                 | SISALv3 | Cheng et al., 2016b       | upstream rainout                                 | change in seasonality     |                                                                                        |
|                     |                  |         |          |      | SB41          | sisal-copRa                 | SISALv3 | Cheng et al., 2016b       | upstream rainout                                 | change in seasonality     |                                                                                        |
| <b>South Europe</b> | Sofular          | 41.4167 | 31.9333  | 440  | SO-4          | SISAL-Bchron                | SISALv3 | Badertschher et al., 2011 | source water composition                         |                           | more negative from Caspian Sea with melt waters, more positive from Mediterranean      |
|                     | Crovassa Azzurra | 39.28   | 8.48     | 410  | CA            | author-linear between dates | SISALv3 | Columbu et al., 2019      | rainfall amount                                  | change in moisture source | flowstone; mixed mineralogy -aragonite with some calcite                               |
|                     | Peqiin cave      | 32.58   | 35.19    | 650  | PEK_composite | author-unknown              | SISALv3 | Bar-Matthews et al., 2003 | rainfall amount                                  | source water composition  | composite includes stalactites                                                         |

|                              |                 |             |             |      |          |                                    |             |                                  |                                                                                         |                                                                               |                                                                                    |
|------------------------------|-----------------|-------------|-------------|------|----------|------------------------------------|-------------|----------------------------------|-----------------------------------------------------------------------------------------|-------------------------------------------------------------------------------|------------------------------------------------------------------------------------|
|                              | Ejulve          | 40.76       | -0.59       | 1240 | ARTEMISA | author-<br>StalAge<br>and<br>other | SISAL<br>v3 | Pérez-<br>Mejías et<br>al., 2017 | temperatur<br>e change                                                                  | source<br>water<br>compositio<br>n                                            | record<br>focuses on<br>$\delta^{18}\text{C}$ as<br>proxy for<br>dry<br>conditions |
| <b>Centr<br/>al<br/>Asia</b> | Kesang          | 42.87       | 81.75       | 2000 | KS06-A   | SISAL-<br>copRa                    | SISAL<br>v3 | Cheng et<br>al., 2016a           | large-scale<br>circulation<br>and supra-<br>regional<br>climate                         | change in<br>moisture<br>transport<br>trajectory<br>and linked<br>seasonality | temperatur<br>e effect on<br>calcite<br>precipitatio<br>n                          |
|                              | Kesang          | 42.87       | 81.75       | 2000 | KS08-1   | SISAL-<br>copRa                    | SISAL<br>v3 | Cheng et<br>al., 2016a           | large-scale<br>circulation<br>and supra-<br>regional<br>climate                         | change in<br>moisture<br>transport<br>trajectory<br>and linked<br>seasonality | temperatur<br>e effect on<br>calcite<br>precipitatio<br>n                          |
| <b>ISM</b>                   | Xiaobailon<br>g | 24.2        | 103.36      | 1500 | XBL-26   | SISAL-<br>copRa                    | SISAL<br>v3 | Cai et<br>al., 2015              | rainfall<br>amount                                                                      |                                                                               |                                                                                    |
|                              | Bittoo          | 30.79<br>03 | 77.776<br>4 | 3000 | BT-9     | sisal-<br>Bchron                   | SISAL<br>v3 | Kathayat<br>et al.,<br>2016      | large-scale<br>circulation,<br>upstream<br>changes,<br>moisture<br>transport<br>history |                                                                               |                                                                                    |

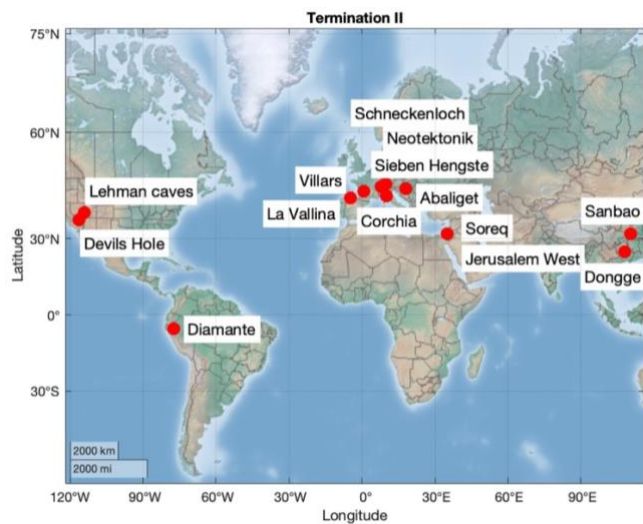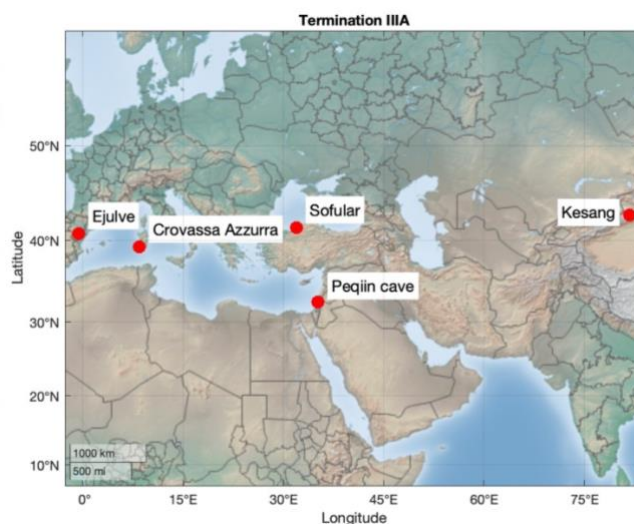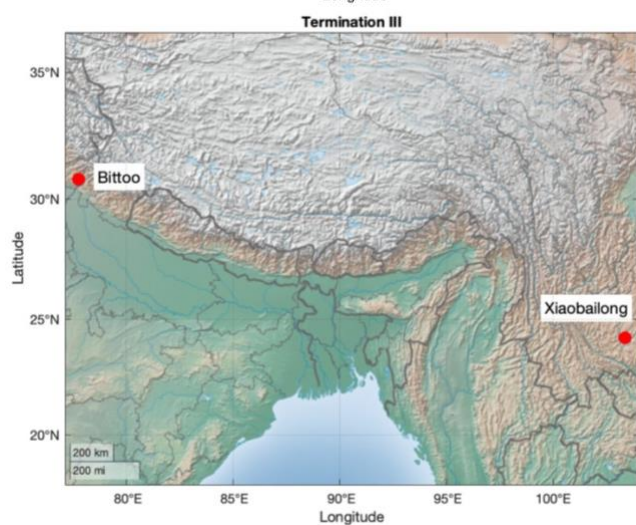

**Supplementary figure 1: Maps plotting locations of speleothem entities that were not analysed as a part of the main manuscript since they only partially cover Terminations or have lower resolution or U-Th dates with larger errors than the records used in the main manuscript.**

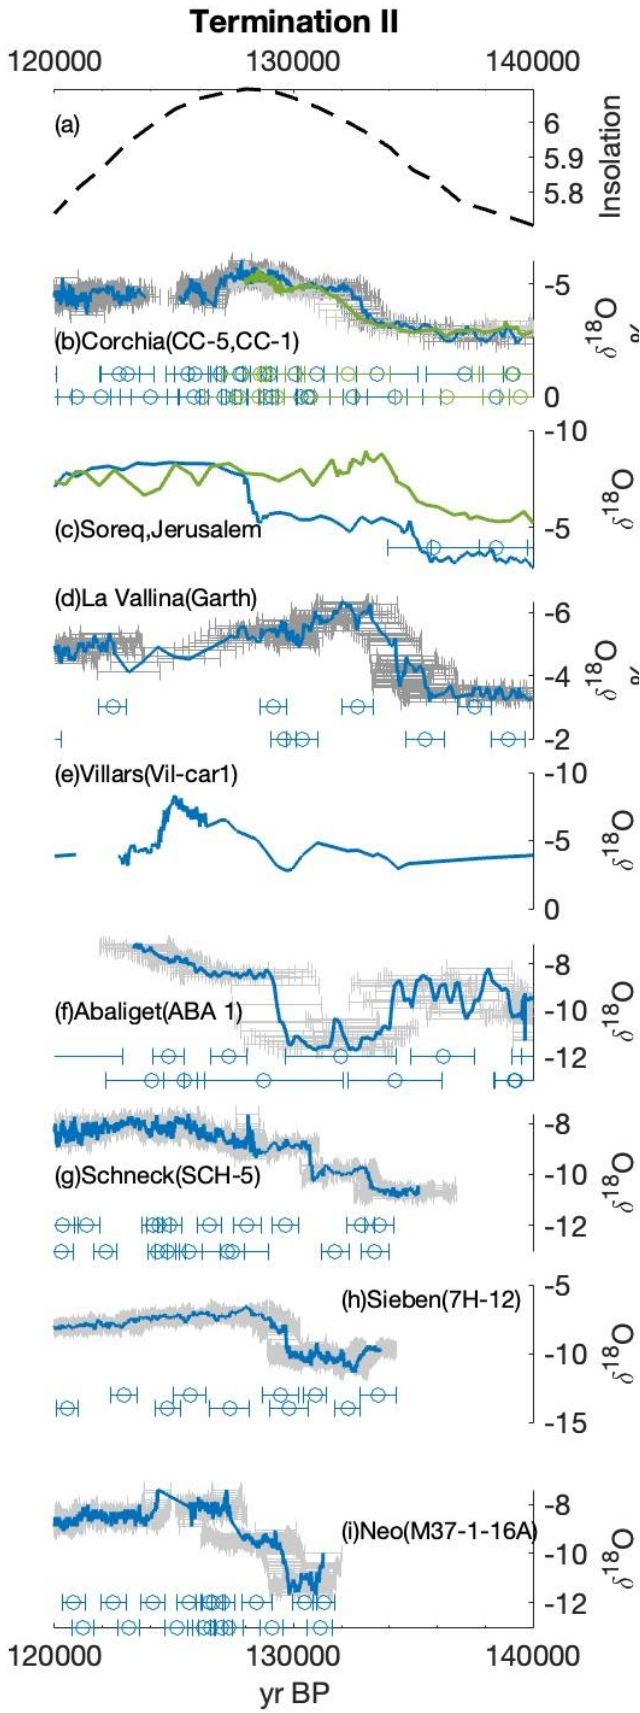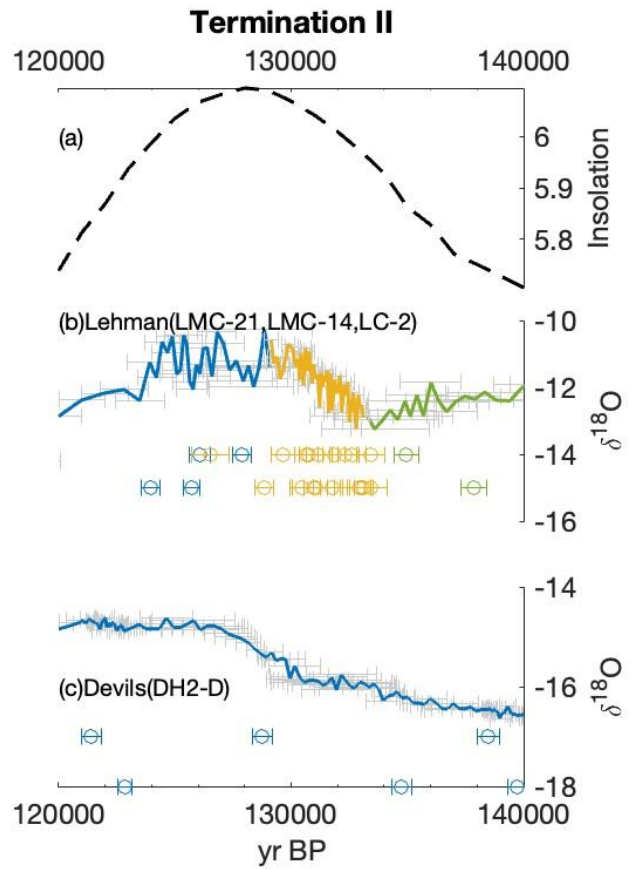

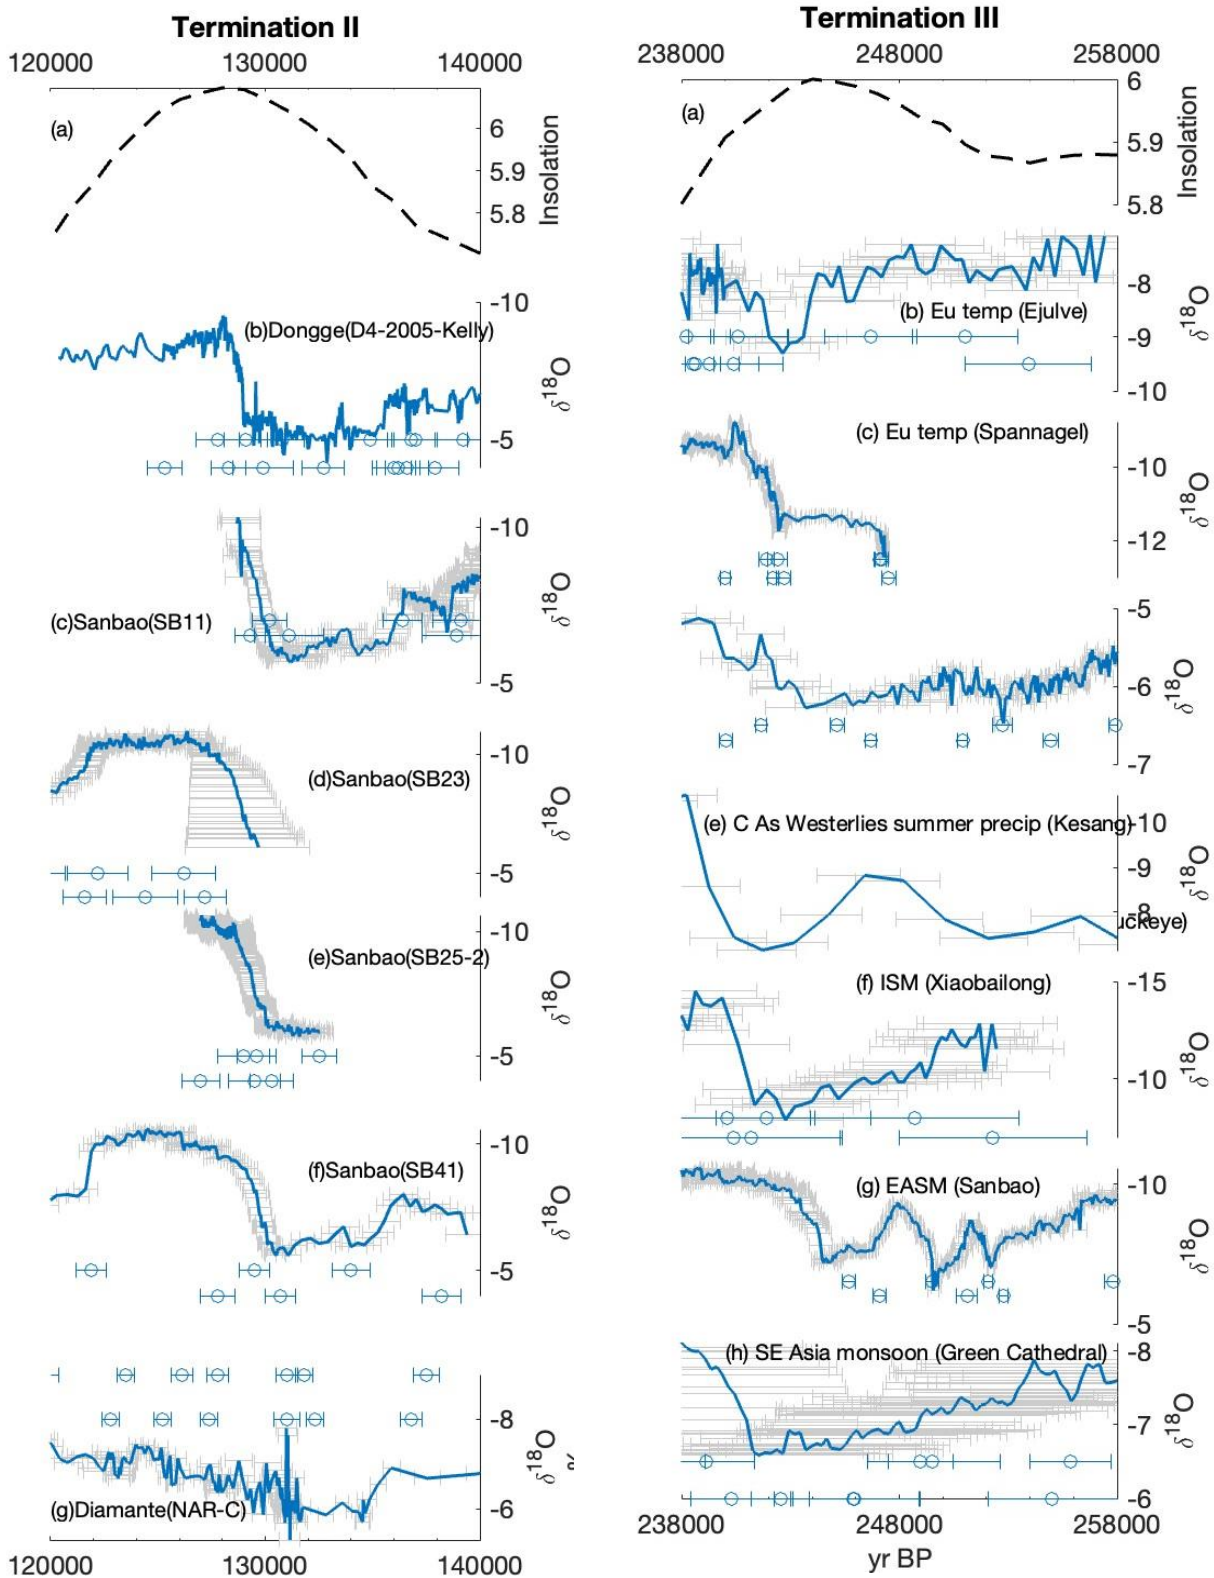

**Supplementary figure 2: Plots of speleothem entities that were not analysed as a part of the main manuscript since they only partially cover Terminations or have lower resolution or U-Th dates with larger errors than the records used in the main manuscript. Key plots from the main manuscript have also been shown in these supplementary figures for comparison. Since a large number of records are available for Termination II, separate plot sections have been made for North Europe, North America and the monsoon records respectively. [precip = precipitation; temp = temperature; N Eu = North Europe; S Eu = South Europe; N Am = North America; C As = Central Asia; ISM = Indian Summer Monsoon; EASM = East Asian Summer Monsoon; SE Asia = Southeast Asia; S Am = South America]**

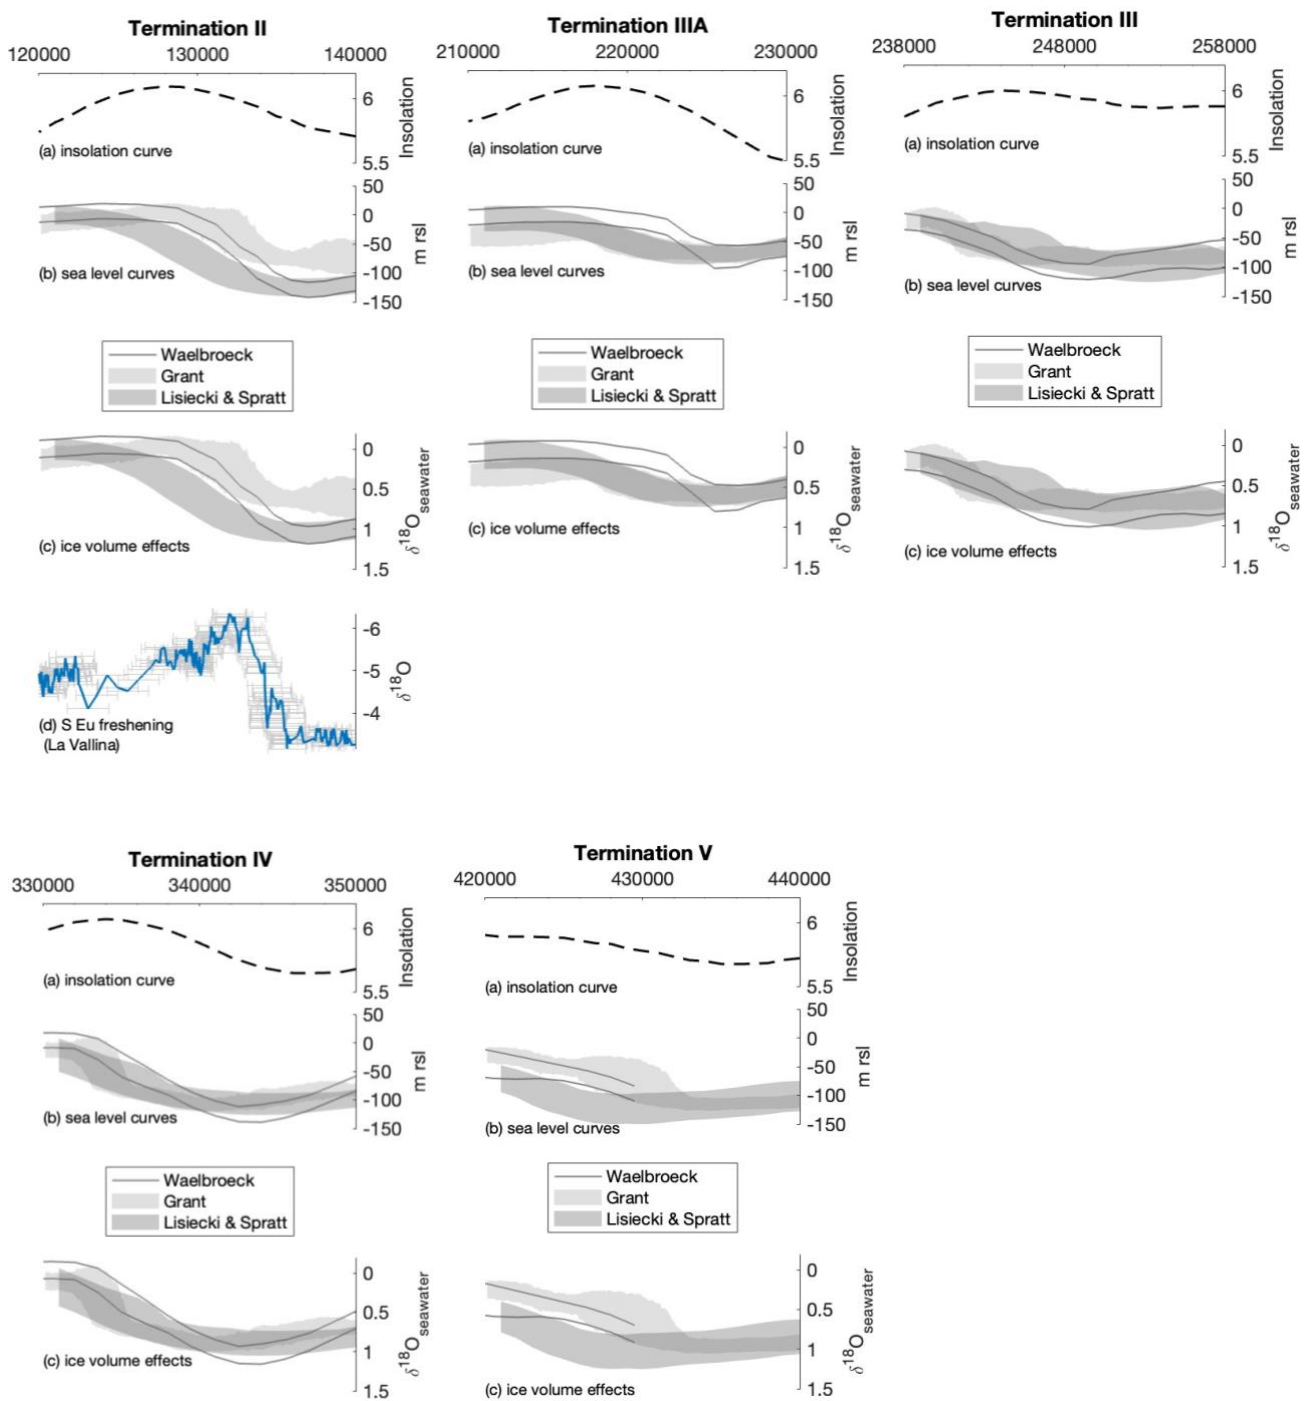

**Supplementary figure 3: Ages covering Terminations are plotted against sea level curves and the ice volume effects on seawater oxygen isotopic records. Spratt and Lisiecki, Waelbroeck and Grant global sea level curves and linked-calculated ice volume effects on surface seawater  $\delta^{18}\text{O}$  values are shown. For Termination II, the North Iberian Speleothem Archive (NISA) record is superimposed over the global curves to showcase the impact of regional North Atlantic changes in sea water  $\delta^{18}\text{O}$  compared to the global curves. Insolation curve is the summer half year caloric insolation as provided in Tzedakis et al., 2017.**



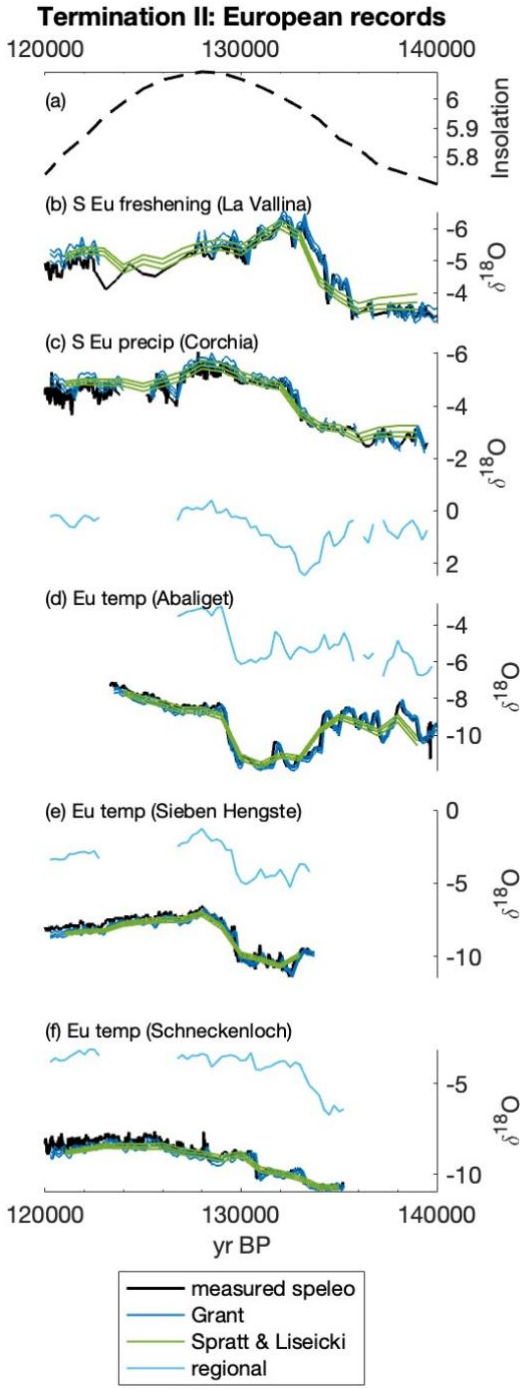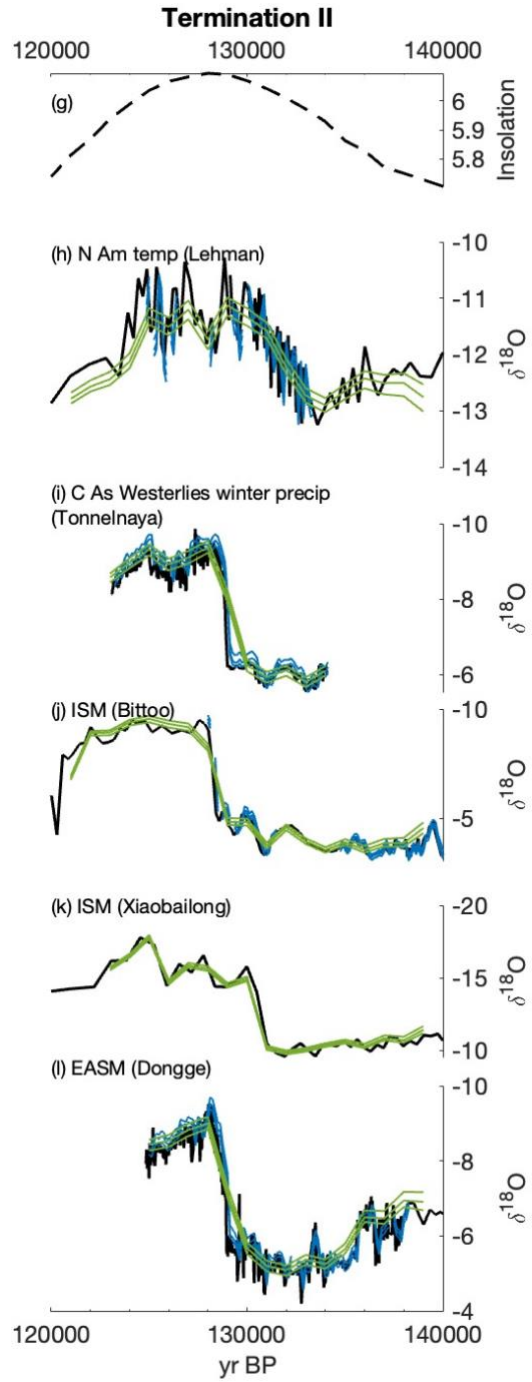

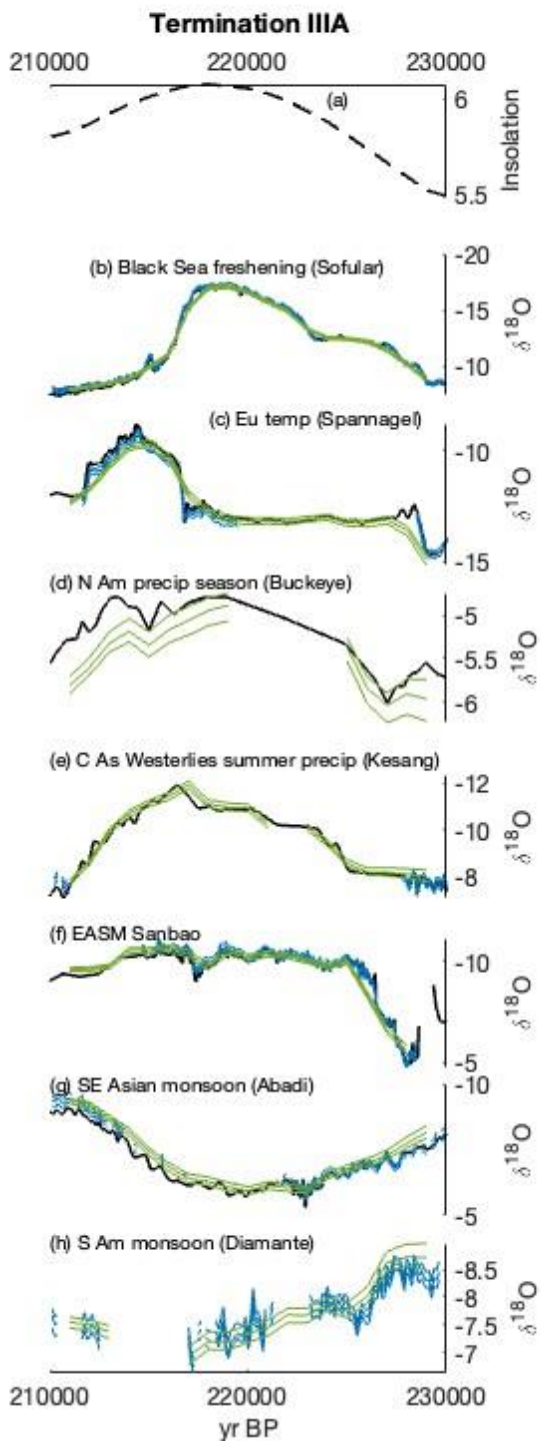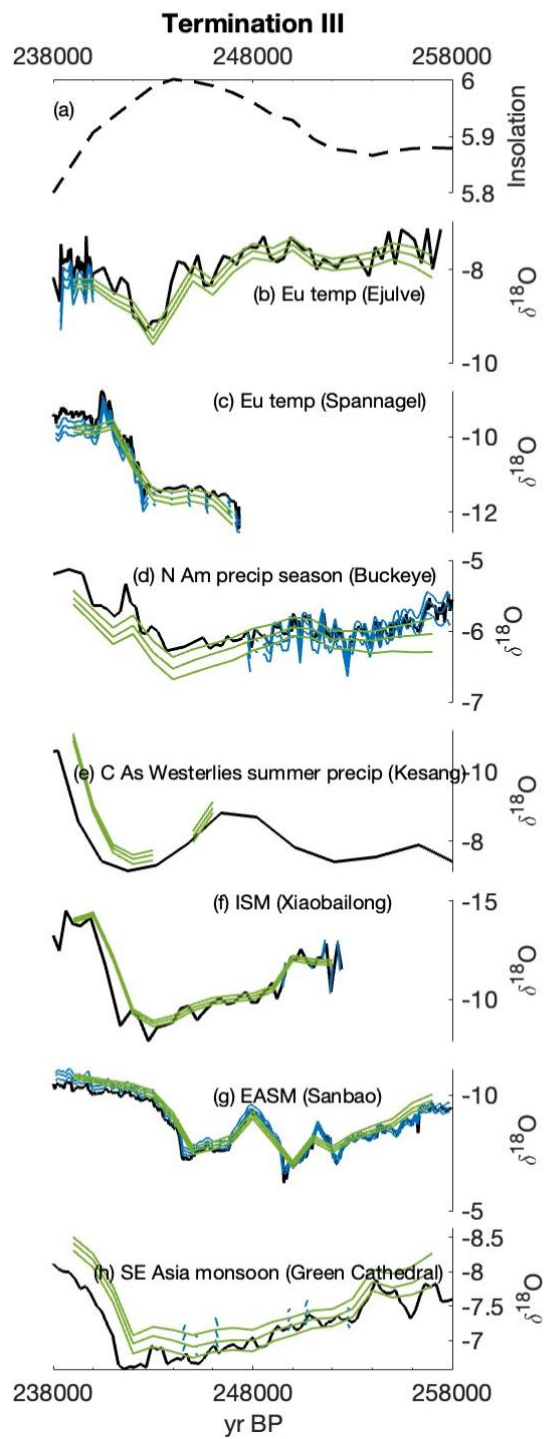

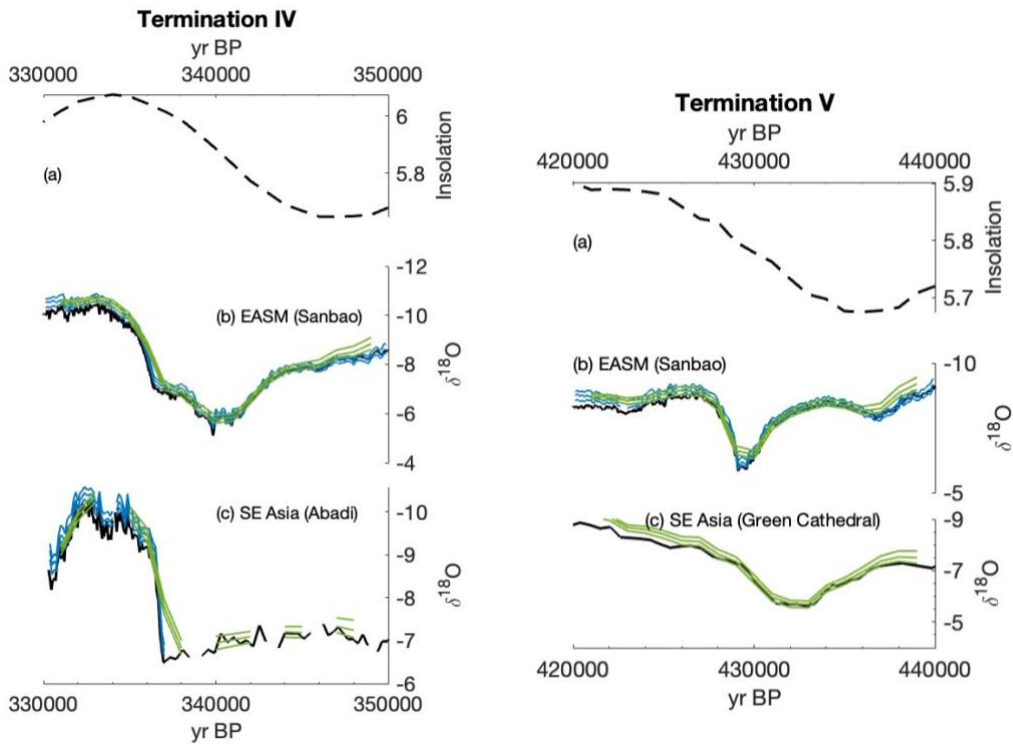

**Supplementary figure 4: Ages covering Terminations are plotted against the ice volume effects on speleothem oxygen isotopic records. Spratt and Lisiecki and Grant ice volume effects are shown. For Termination II, the North Iberian Speleothem Archive (NISA) record is superimposed over the Europe speleothem data to showcase the impact of regional North Atlantic changes in sea water  $\delta^{18}\text{O}$  compared to the global curves. Insolation curve is the summer half year caloric insolation as provided in Tzedakis et al., 2017. [precip = precipitation; temp = temperature; N Eu = North Europe; S Eu = South Europe; N Am = North America; C As = Central Asia; ISM = Indian Summer Monsoon; EASM = East Asian Summer Monsoon; SE Asia = Southeast Asia; S Am = South America]**

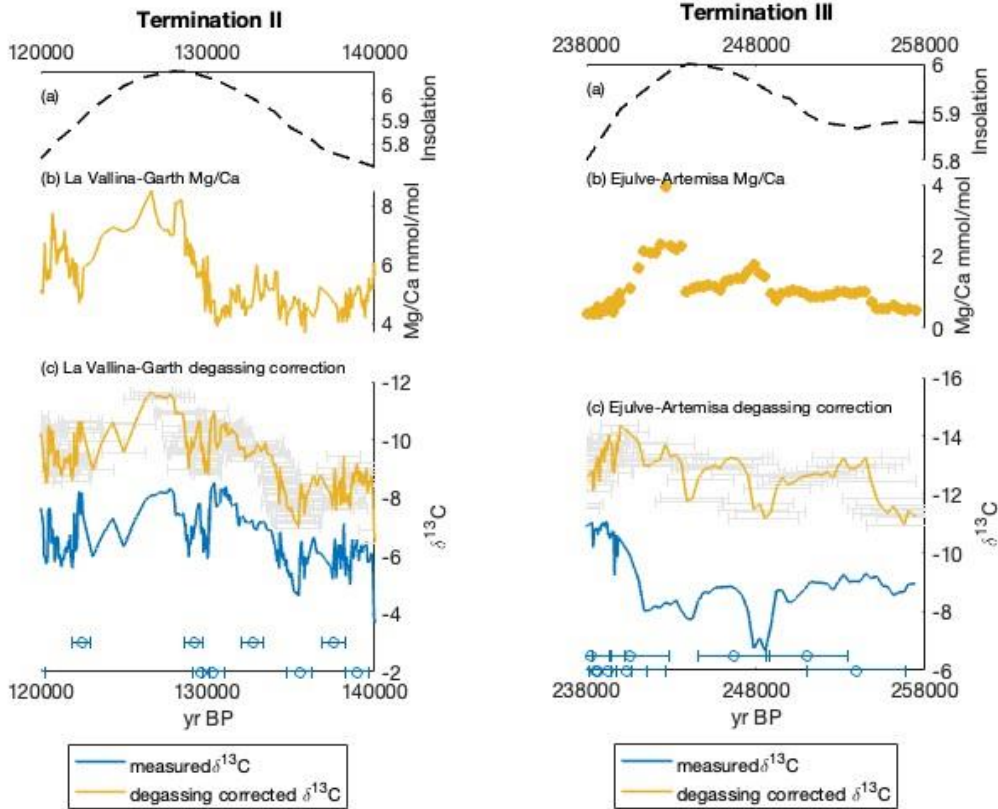

Supplementary figure 5: Ages covering Terminations for the South European records from La Vallina and Ejulve caves are plotted against measured  $\delta^{13}\text{C}$ , degassing corrected  $\delta^{13}\text{C}$  ( $\delta^{13}\text{C}_{\text{corr}}$ ) and Mg/Ca records. The  $\delta^{13}\text{C}_{\text{corr}}$  values are derived from an index based on the Mg/Ca data providing  $\delta^{13}\text{C}$  ‘initial’ values that give temperature information.

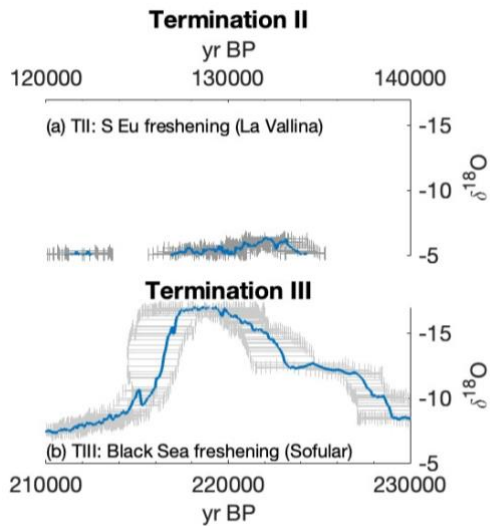

Supplementary figure 6: Ages covering Terminations are plotted against oxygen isotopic measurements. The Y-axis limits are constant across the sub-plots so that  $\delta^{18}\text{O}$  anomaly magnitudes can be compared across different Terminations in speleothems encoding a similar climatic signal of surface ocean freshening. [S Eu = South Europe]

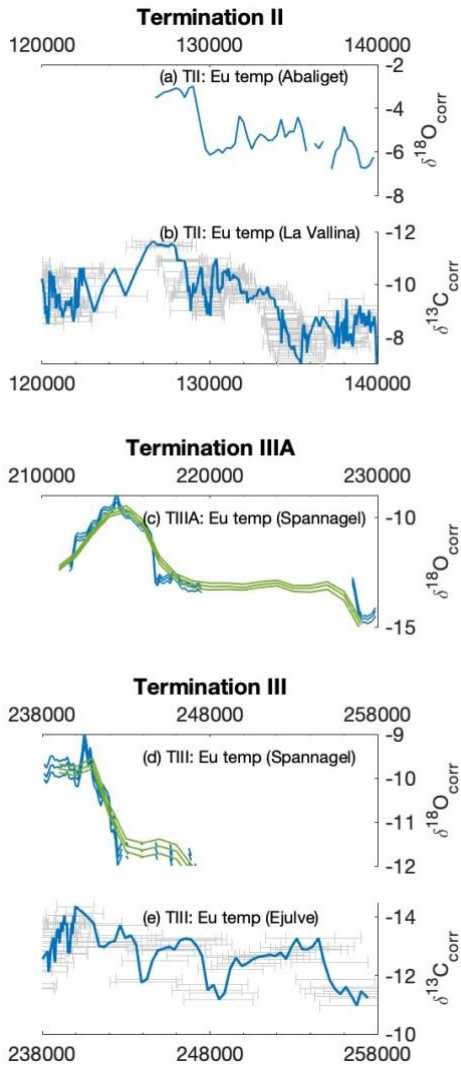

**Supplementary figure 7: Ages covering Terminations are plotted against oxygen and carbon isotopic measurements. The records cover different Terminations encoding a similar climatic signal of temperature. [temp = temperature; Eu = Europe]**

### Termination II

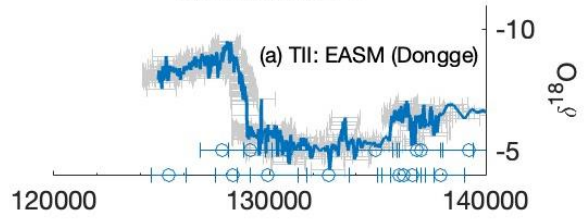

### Termination IIIA

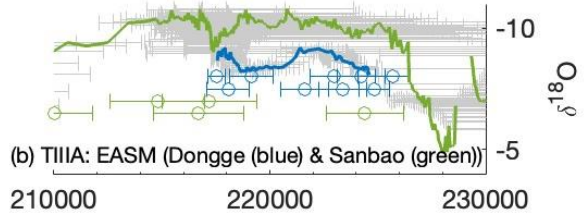

### Termination III

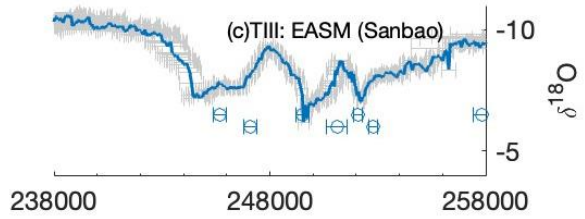

### Termination IV

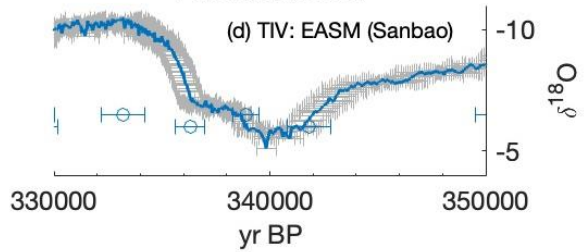

### Termination V

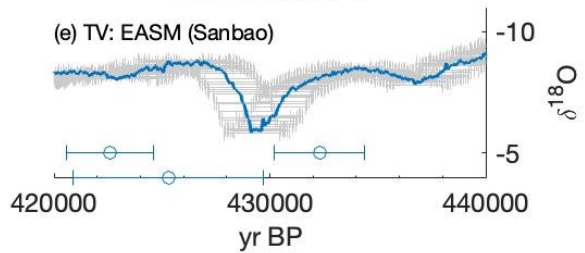

### Termination II

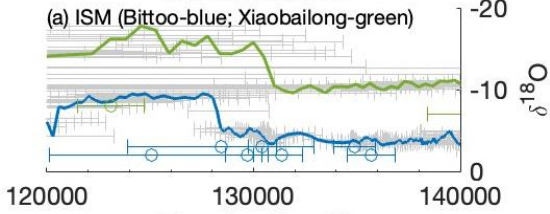

### Termination III

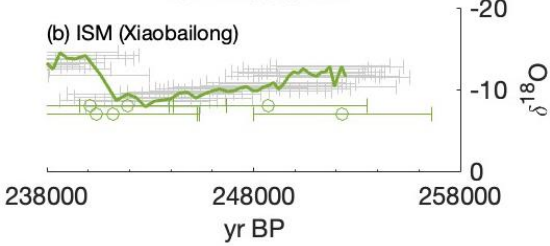

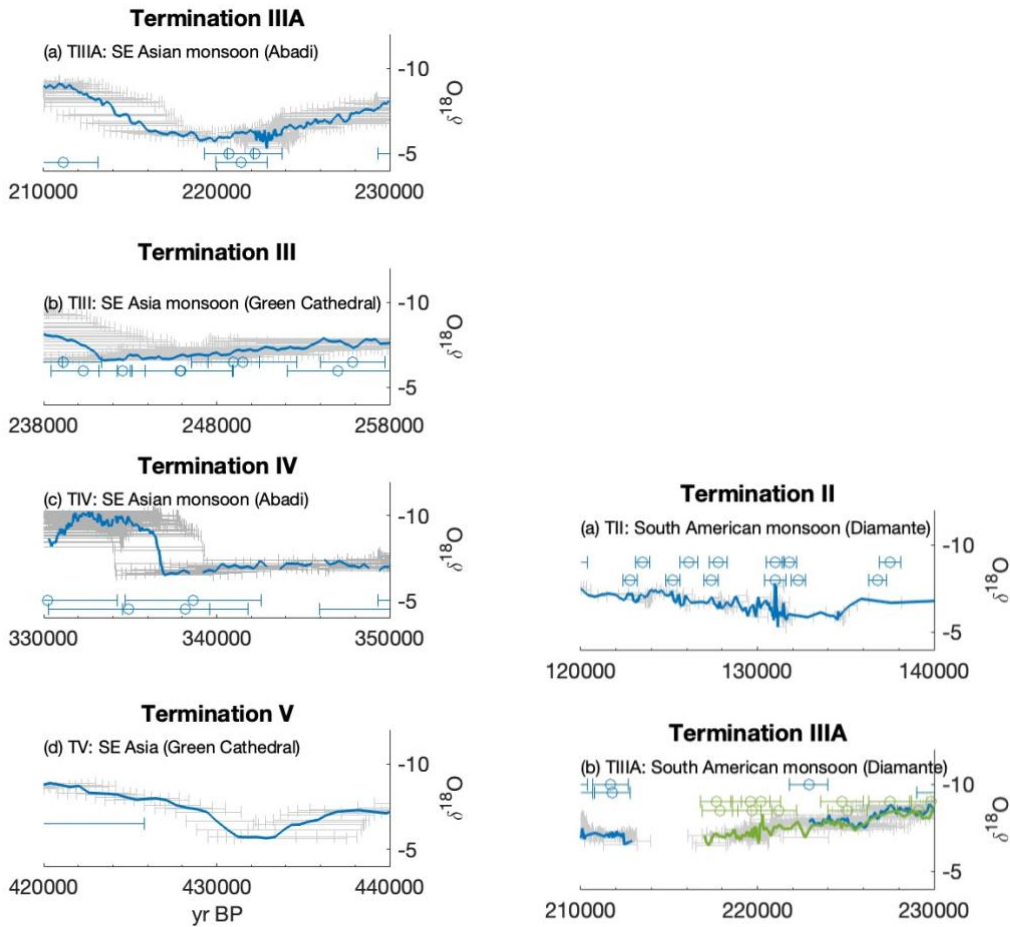

**Supplementary figure 8: Ages covering Terminations are plotted against oxygen isotopic measurements. The Y-axis limits are constant across the sub-plots so that  $\delta^{18}\text{O}$  anomaly magnitudes can be compared across different Terminations in speleothems encoding a similar climatic signal of monsoon-driven changes. [precip = precipitation; temp = temperature; N Eu = North Europe; S Eu = South Europe; N Am = North America; C As = Central Asia; ISM = Indian Summer Monsoon; EASM = East Asian Summer Monsoon; SE Asia = Southeast Asia; S Am = South America]**

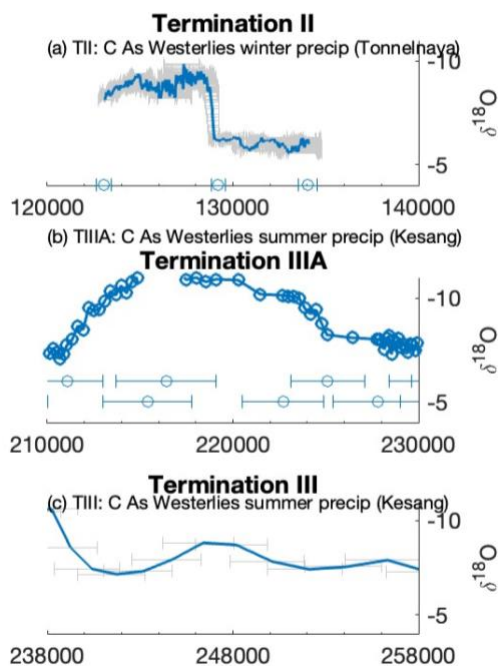

**Supplementary figure 9: Ages covering Terminations are plotted against oxygen isotopic measurements. The Y-axis limits are constant across the sub-plots so that  $\delta^{18}\text{O}$  anomaly magnitudes can be compared across different Terminations in speleothems encoding a similar climatic signal of Westerlies driven changes. [precip = precipitation; C As = Central Asia]**

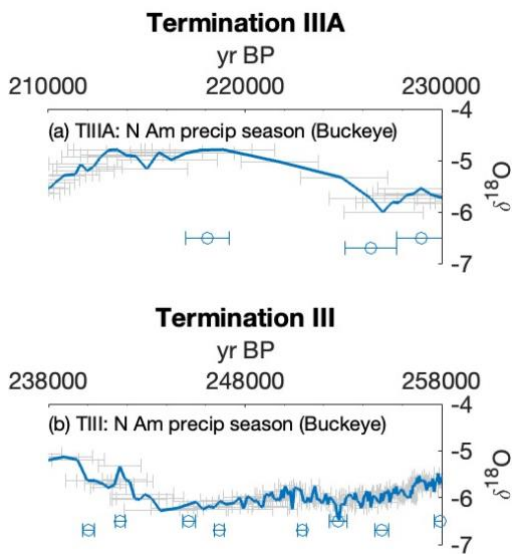

**Supplementary figure 10: Ages covering Terminations are plotted against oxygen isotopic measurements. The Y-axis limits are constant across the sub-plots so that  $\delta^{18}\text{O}$  anomaly magnitudes can be compared across different Terminations in speleothems encoding a similar climatic signal of source moisture and seasonality changes. [precip = precipitation; N Am = North America]**



- Badertscher, S., Fleitmann, D., Cheng, H., Edwards, R. L., Göktürk, O. M., Zumbühl, A., Leuenberger, M., and Tüysüz, O.: Pleistocene water intrusions from the Mediterranean and Caspian seas into the Black Sea, *Nat. Geosci.*, 4, 236–239, <https://doi.org/10.1038/ngeo1106>, 2011.
- Bar-Matthews, M., Ayalon, A., Gilmour, M., Matthews, A., and Hawkesworth, C. J.: Sea–land oxygen isotopic relationships from planktonic foraminifera and speleothems in the Eastern Mediterranean region and their implication for paleorainfall during interglacial intervals, *Geochim. Cosmochim. Acta*, 67, 3181–3199, [https://doi.org/10.1016/S0016-7037\(02\)01031-1](https://doi.org/10.1016/S0016-7037(02)01031-1), 2003.
- Cai, Y., Fung, I. Y., Edwards, R. L., An, Z., Cheng, H., Lee, J.-E., Tan, L., Shen, C.-C., Wang, X., Day, J. A., Zhou, W., Kelly, M. J., and Chiang, J. C. H.: Variability of stalagmite-inferred Indian monsoon precipitation over the past 252,000 y, *Proc. Natl. Acad. Sci.*, 112, 2954–2959, <https://doi.org/10.1073/pnas.1424035112>, 2015.
- Cheng, H., Spötl, C., Breitenbach, S. F. M., Sinha, A., Wassenburg, J. A., Jochum, K. P., Scholz, D., Li, X., Yi, L., Peng, Y., Lv, Y., Zhang, P., Votintseva, A., Loginov, V., Ning, Y., Kathayat, G., and Edwards, R. L.: Climate variations of Central Asia on orbital to millennial timescales, *Sci. Rep.*, 6, 36975, <https://doi.org/10.1038/srep36975>, 2016a.
- Cheng, H., Edwards, R. L., Sinha, A., Spötl, C., Yi, L., Chen, S., Kelly, M., Kathayat, G., Wang, X., Li, X., Kong, X., Wang, Y., Ning, Y., and Zhang, H.: The Asian monsoon over the past 640,000 years and ice age terminations, *Nature*, 534, 640–646, <https://doi.org/10.1038/nature18591>, 2016b.
- Columbu, A., Spötl, C., De Waele, J., Yu, T.-L., Shen, C.-C., and Gázquez, F.: A long record of MIS 7 and MIS 5 climate and environment from a western Mediterranean speleothem (SW Sardinia, Italy), *Quat. Sci. Rev.*, 220, 230–243, <https://doi.org/10.1016/j.quascirev.2019.07.023>, 2019.
- Frumkin, A., Ford, D. C., and Schwarcz, H. P.: Continental Oxygen Isotopic Record of the Last 170,000 Years in Jerusalem, *Quat. Res.*, 51, 317–327, <https://doi.org/10.1006/qres.1998.2031>, 1999.
- Kathayat, G., Cheng, H., Sinha, A., Spötl, C., Edwards, R. L., Zhang, H., Li, X., Yi, L., Ning, Y., Cai, Y., Lui, W. L., and Breitenbach, S. F. M.: Indian monsoon variability on millennial-orbital timescales, *Sci. Rep.*, 6, 24374, <https://doi.org/10.1038/srep24374>, 2016.
- Kelly, M. J., Edwards, R. L., Cheng, H., Yuan, D., Cai, Y., Zhang, M., Lin, Y., and An, Z.: High resolution characterization of the Asian Monsoon between 146,000 and 99,000 years B.P. from Dongge Cave, China and global correlation of events surrounding Termination II, *Palaeogeogr. Palaeoclimatol. Palaeoecol.*, 236, 20–38, <https://doi.org/10.1016/j.palaeo.2005.11.042>, 2006.
- Koltai, G., Spötl, C., Shen, C.-C., Wu, C.-C., Rao, Z., Palsu, L., Kele, S., Surányi, G., and Bárány-Kevei, I.: A penultimate glacial climate record from southern Hungary, *J. Quat. Sci.*, 32, 946–956, <https://doi.org/10.1002/jqs.2968>, 2017.
- Lachniet, M. S., Denniston, R. F., Asmerom, Y., and Polyak, V. J.: Orbital control of western North America atmospheric circulation and climate over two glacial cycles, *Nat. Commun.*, 5, 3805, <https://doi.org/10.1038/ncomms4805>, 2014.
- Luetscher, M., Moseley, G. E., Festi, D., Hof, F., Edwards, R. L., and Spötl, C.: A Last Interglacial speleothem record from the Sieben Hengste cave system (Switzerland): Implications for alpine paleovegetation, *Quat. Sci. Rev.*, 262, 106974, <https://doi.org/10.1016/j.quascirev.2021.106974>, 2021.
- Moseley, G. E., Spötl, C., Cheng, H., Boch, R., Min, A., and Edwards, R. L.: Termination-II interstadial/stadial climate change recorded in two stalagmites from the north European Alps, *Quat. Sci. Rev.*, 127, 229–239, <https://doi.org/10.1016/j.quascirev.2015.07.012>, 2015.
- Moseley, G. E., Edwards, R. L., Wendt, K. A., Cheng, H., Dublyansky, Y., Lu, Y., Boch, R., and Spötl, C.: Reconciliation of the Devils Hole climate record with orbital forcing, *Science*, 351, 165–168, <https://doi.org/10.1126/science.aad4132>, 2016.
- Pérez-Mejías, C., Moreno, A., Sancho, C., Bartolomé, M., Stoll, H., Cacho, I., Cheng, H., and Edwards, R. L.: Abrupt climate changes during Termination III in Southern Europe, *Proc. Natl. Acad. Sci.*, 114, 10047–10052, <https://doi.org/10.1073/pnas.1619615114>, 2017.

Shakun, J. D., Burns, S. J., Clark, P. U., Cheng, H., and Edwards, R. L.: Milankovitch-paced Termination II in a Nevada speleothem?, *Geophys. Res. Lett.*, 38, <https://doi.org/10.1029/2011GL048560>, 2011.

Stoll, H. M., Cacho, I., Gasson, E., Sliwinski, J., Kost, O., Moreno, A., Iglesias, M., Torner, J., Perez-Mejias, C., Haghpor, N., Cheng, H., and Edwards, R. L.: Rapid northern hemisphere ice sheet melting during the penultimate deglaciation, *Nat. Commun.*, 13, 3819, <https://doi.org/10.1038/s41467-022-31619-3>, 2022.

Tzedakis, P. C., Crucifix, M., Mitsui, T., and Wolff, E. W.: A simple rule to determine which insolation cycles lead to interglacials, *Nature*, 542, 427–432, <https://doi.org/10.1038/nature21364>, 2017.

Tzedakis, P. C., Drysdale, R. N., Margari, V., Skinner, L. C., Menviel, L., Rhodes, R. H., Taschetto, A. S., Hodell, D. A., Crowhurst, S. J., Hellstrom, J. C., Fallick, A. E., Grimalt, J. O., McManus, J. F., Martrat, B., Mokeddem, Z., Parrenin, F., Regattieri, E., Roe, K., and Zanchetta, G.: Enhanced climate instability in the North Atlantic and southern Europe during the Last Interglacial, *Nat. Commun.*, 9, 4235, <https://doi.org/10.1038/s41467-018-06683-3>, 2018.

Wainer, K., Genty, D., Blamart, D., Daëron, M., Bar-Matthews, M., Vonhof, H., Dublyansky, Y., Pons-Branchu, E., Thomas, L., van Calsteren, P., Quinif, Y., and Caillon, N.: Speleothem record of the last 180 ka in Villars cave (SW France): Investigation of a large  $\delta^{18}\text{O}$  shift between MIS6 and MIS5, *Quat. Sci. Rev.*, 30, 130–146, <https://doi.org/10.1016/j.quascirev.2010.07.004>, 2011.

Wilcox, P. S., Honiat, C., Trüssel, M., Edwards, R. L., and Spötl, C.: Exceptional warmth and climate instability occurred in the European Alps during the Last Interglacial period, *Commun. Earth Environ.*, 1, 1–6, <https://doi.org/10.1038/s43247-020-00063-w>, 2020.
